# Supplementary material for: Identification of Bacteria and Viruses Associated with Patients with Acute Febrile Illness in Khon Kaen Province, Thailand
Source: MDPI journal article supplement (doi:10.3390/v16040630), 2024-04-18
Supplement: s1 [file s1]

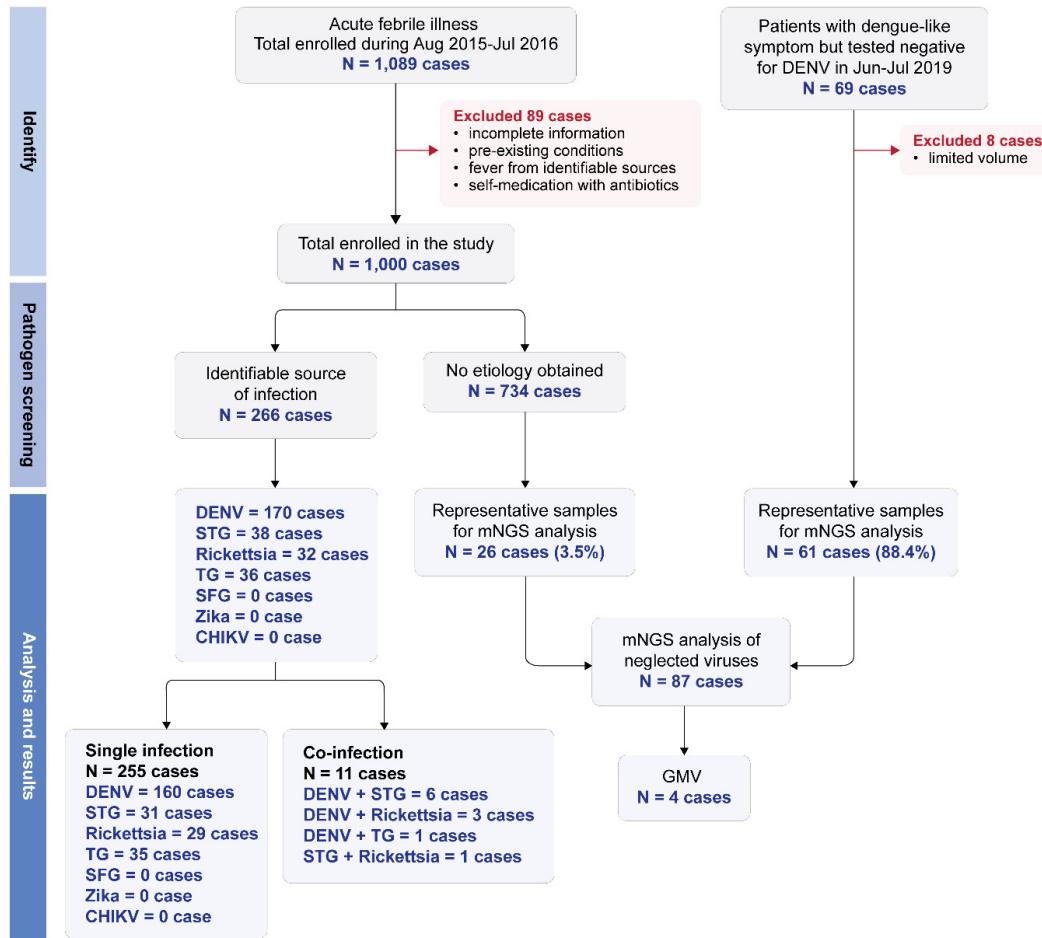

Figure S1. Sample selection flowchart.

Table S1. Designed primer sets for GMV detection and complete genome identification.

| GMV              | Fragment no.          | Oligo name              | Sequence (5' to 3')                       | Primer  | Product size (bp) |
|------------------|-----------------------|-------------------------|-------------------------------------------|---------|-------------------|
| RdRp region      | 1 <sup>st</sup> PCR   | GMV_RdRp_F1-1947        | CTGGCTACTGTATTYTGACTC                     | Forward | 420               |
|                  | 2 <sup>nd</sup> PCR   | GMV_RdRp_F2-2008        | TATATGCTGTGATCCGGATAG                     | Forward | 360               |
|                  |                       | T7-GMV_RdRp_R1-2370     | TAATACGACTCACTATAGGGTGTACAGTC-CARTCCCAAGC | Reverse |                   |
| Genome segment 1 |                       | GMV_Seg1_F1-2           | TTCCTAACTGTAAAACGAGATG                    | Forward |                   |
|                  | 1_1 <sup>st</sup> PCR | GMV_Seg1_R1-900         | AAGGCGCTCCACTAAATCCT                      | Reverse | 899               |
|                  | 1_2 <sup>nd</sup> PCR | GMV_Seg1_nested R1-790  | ACACTCAAGCCGGCATCTTT                      | Reverse | 789               |
|                  |                       | GMV_Seg1_F2-703         | GCAATCCAACACTGATAACGC                     | Forward |                   |
|                  | 2_1 <sup>st</sup> PCR | GMV_Seg1_R2-1466        | ATAGGCGCCACAAGACTCAC                      | Reverse | 764               |
|                  | 2_2 <sup>nd</sup> PCR | GMV_Seg1_nested R2-1424 | TTTACTCTTAGGTTCTGGAGGA                    | Reverse | 722               |
|                  |                       | GMV_Seg1_F3-1252        | TTGATCTCGAAGCTGTAACCA                     | Forward |                   |
|                  | 3_1 <sup>st</sup> PCR | GMV_Seg1_R3-2230        | TCTGGCTATCCAAGCGAACA                      | Reverse | 979               |
|                  | 3_2 <sup>nd</sup> PCR | GMV_Seg1_nested R3-2138 | TCATTTTATGCGGCTCTTGCT                     | Reverse | 887               |
|                  | 4_1 <sup>st</sup> PCR | GMV_RdRp_F2-2008        | TATATGCTGTGATCCGGATAG                     | Forward | 1,031             |
| Genome segment 2 | 4_2 <sup>nd</sup> PCR | GMV_Seg1_nested F4-2059 | AAGGTTCAATGAGTTGTTGGC                     | Forward | 980               |
|                  |                       | GMV_Seg1_R4-3038        | ACTCATCCCGTTTCACTCAC                      | Reverse |                   |
|                  |                       | GMV_Seg2_F1-147         | CACAATGAGTAAACAGTTGAAGA                   | Forward |                   |
|                  | 1_1 <sup>st</sup> PCR | GMV_Seg2_R1-1003        | CTGCATACGTTATCATATCCCT                    | Reverse | 857               |
|                  | 1_2 <sup>nd</sup> PCR | GMV_Seg2_nested R1-902  | GCCCCGACTTCATATAGGGT                      | Reverse | 756               |
|                  | 2_1 <sup>st</sup> PCR | GMV_Seg2_F2-770         | ACATCTGGATCCACTATAAGG                     | Forward | 893               |
|                  | 2_2 <sup>nd</sup> PCR | GMV_Seg2_nested F2-839  | CTCCAGGACCTAGTGTGTTT                      | Forward | 824               |
|                  |                       | GMV_Seg2_R2-1662        | TAACGACACGTTGGCAAACATA                    | Reverse |                   |

**Table S2.** Information on the Renna virus and 17 GMV references used for specific-primer design in genome sequence study.

| Genome    | Accession numbers | Virus strain                                       | Length (bp) |
|-----------|-------------------|----------------------------------------------------|-------------|
| Segment 1 | MK285337.1        | Renna virus clone RENV_S1_Mex_2016                 | 2,739       |
|           | MN053793.1        | Guadeloupe mosquito virus strain Ab-AAM-5          | 3,136       |
|           | MN053803.1        | Guadeloupe mosquito virus strain PB-AAM-1-4        | 3,119       |
|           | MN053801.1        | Guadeloupe mosquito virus strain PB-AAM-5          | 3,174       |
|           | MN053797.1        | Guadeloupe mosquito virus strain PB-AAM-1-2        | 3,127       |
|           | MN053805.1        | Guadeloupe mosquito virus strain Ab-AAF            | 3,095       |
|           | MN053799.1        | Guadeloupe mosquito virus strain PB-AAM-1-3        | 3,039       |
|           | MN053791.1        | Guadeloupe mosquito virus strain Ab-AAF-5          | 3,142       |
|           | MN053807.1        | Guadeloupe mosquito virus strain Ab-AAM            | 3,141       |
|           | MN053795.1        | Guadeloupe mosquito virus strain PB-AAF-1-3        | 3,100       |
|           | MN053789.1        | Guadeloupe mosquito virus strain Ab-AAF-1-5        | 3,084       |
|           | MN053787.1        | Guadeloupe mosquito virus strain Ab-AAF-1-1        | 3,104       |
|           | MW434817.1        | Guadeloupe mosquito virus isolate CMS002_017a_SAND | 3,110       |
|           | MW434816.1        | Guadeloupe mosquito virus isolate CMS002_018a_SAND | 3,114       |
|           | MW434815.1        | Guadeloupe mosquito virus isolate CMS002_018b_SAND | 3,137       |
|           | MW434814.1        | Guadeloupe mosquito virus isolate CMS002_017b_SAND | 3,138       |
|           | MW434813.1        | Guadeloupe mosquito virus isolate CMS002_017e_SAND | 3,166       |
|           | MW434812.1        | Guadeloupe mosquito virus isolate CMS002_019a_SAND | 3,167       |
| Segment 2 | MK285338.1        | Renna virus clone RENV_S2_Mex_2017, partial genome | 1,131       |
|           | MN053794.1        | Guadeloupe mosquito virus strain Ab-AAM-5          | 1,626       |
|           | MN053804.1        | Guadeloupe mosquito virus strain PB-AAM-1-4        | 1,731       |
|           | MN053802.1        | Guadeloupe mosquito virus strain PB-AAM-5          | 1,640       |
|           | MN053798.1        | Guadeloupe mosquito virus strain PB-AAM-1-2        | 1,664       |
|           | MN053806.1        | Guadeloupe mosquito virus strain Ab-AAF            | 1,628       |
|           | MN053800.1        | Guadeloupe mosquito virus strain PB-AAM-1-3        | 1,615       |
|           | MN053792.1        | Guadeloupe mosquito virus strain Ab-AAF-5          | 1,640       |
|           | MN053808.1        | Guadeloupe mosquito virus strain Ab-AAM            | 1,590       |
|           | MN053796.1        | Guadeloupe mosquito virus strain PB-AAF-1-3        | 1,604       |
|           | MN053790.1        | Guadeloupe mosquito virus strain Ab-AAF-1-5        | 1,696       |
|           | MN053788.1        | Guadeloupe mosquito virus strain Ab-AAF-1-1        | 1,683       |
|           | MW434811.1        | Guadeloupe mosquito virus isolate CMS002_017a_SAND | 1,586       |
|           | MW434805.1        | Guadeloupe mosquito virus isolate CMS002_018a_SAND | 1,633       |
|           | MW434810.1        | Guadeloupe mosquito virus isolate CMS002_018b_SAND | 1,597       |
|           | MW434806.1        | Guadeloupe mosquito virus isolate CMS002_017b_SAND | 1,583       |
|           | MW434809.1        | Guadeloupe mosquito virus isolate CMS002_017e_SAND | 1,619       |
|           | MW434804.1        | Guadeloupe mosquito virus isolate CMS002_019a_SAND | 1,637       |

**Table S3.** Sequencing read statistics and host filtering.

| Sample pools | Raw reads | Filtered reads | % human-aligned reads |
|--------------|-----------|----------------|-----------------------|
| VF1          | 661,242   | 576,511        | 1.5%                  |
| VF2          | 617,803   | 529,469        | 5.4%                  |
| VF3          | 667,502   | 567,392        | 8.0%                  |
| VF4          | 774,779   | 675,115        | 11.4%                 |
| VF5          | 604,549   | 522,602        | 10.9%                 |
| VF6          | 851,898   | 732,086        | 2.9%                  |
| VF7          | 1,229,577 | 1,091,541      | 3.3%                  |
| VF8          | 726,914   | 593,816        | 4.3%                  |
| VF9          | 627,899   | 561,609        | 4.5%                  |

**Table S4.** The normalized for million reads and BlastX analysis of each contig.

| Sample pool | Contig name | Reads per million | Accession      | Identity | Name virus                               |
|-------------|-------------|-------------------|----------------|----------|------------------------------------------|
| VF1         | Contig701   | 487               | QRW42396.1     | 51.43%   | Guadeloupe mosquito virus                |
| VF1         | Contig26    | 27013             | QEM39253.1     | 96.20%   | Guadeloupe mosquito virus                |
| VF2         | Contig878   | 634               | QEM39253.1     | 88.24%   | Guadeloupe mosquito virus                |
| VF2         | Contig59    | 43433             | QEM39253.1     | 100.00%  | Guadeloupe mosquito virus                |
| VF3         | Contig101   | 44                | QEM39257.1     | 82.98%   | Guadeloupe mosquito virus                |
| VF4         | Contig1125  | 15                | QEM39257.1     | 72.41%   | Guadeloupe mosquito virus                |
| VF4         | Contig99    | 1298              | QEM39273.1     | 100.00%  | Guadeloupe mosquito virus                |
| VF5         | Contig1165  | 4883              | QEM39257.1     | 81.63%   | Guadeloupe mosquito virus                |
| VF5         | Contig35    | 13514             | QEM39285.1     | 98.85%   | Guadeloupe mosquito virus                |
| VF6         | Contig1146  | 15                | QEM39253.1     | 92.59%   | Guadeloupe mosquito virus                |
| VF7         | Contig10841 | 89                | QEM39256.1     | 91.38%   | Guadeloupe mosquito virus                |
| VF8         | Contig31    | 26762             | QEM39285.1     | 100.00%  | Guadeloupe mosquito virus                |
| VF2         | Contig28    | 26748             | QBA55493.1     | 92.31%   | Renna virus                              |
| VF2         | Contig45    | 249668            | QBA55493.1     | 97.97%   | Renna virus                              |
| VF5         | Contig663   | 428               | QBA55493.1     | 100.00%  | Renna virus                              |
| VF7         | Contig2002  | 74                | QBA55493.1     | 95.59%   | Renna virus                              |
| VF9         | Contig76    | 199256            | YP_009448556.1 | 42.47%   | Orpheovirus IHUMI-LCC2                   |
| VF3         | Contig18    | 89198             | UHK03708.1     | 99.64%   | Torque teno midi virus                   |
| VF4         | Contig1161  | 1077              | UHK06663.1     | 70.51%   | Torque teno midi virus                   |
| VF5         | Contig19    | 752               | UHK06680.1     | 100.00%  | Torque teno midi virus                   |
| VF9         | Contig640   | 15                | UHK03708.1     | 96.63%   | Torque teno midi virus                   |
| VF8         | Contig2     | 73191             | UGV44924.1     | 99.40%   | Torque teno virus                        |
| VF9         | Contig599   | 30                | UGV44924.1     | 100.00%  | Torque teno virus                        |
| VF9         | Contig41    | 30                | UGV44924.1     | 100.00%  | Torque teno virus                        |
| VF5         | Contig8     | 18500             | UGV33890.1     | 96.67%   | TTV-like mini virus                      |
| VF5         | Contig4     | 29049             | UGV36855.1     | 99.64%   | TTV-like mini virus                      |
| VF8         | Contig1     | 5665              | UGV38306.1     | 97.95%   | TTV-like mini virus                      |
| VF3         | Contig121   | 47845             | YP_003969769.1 | 25.49%   | Cafeteria roenbergensis virus            |
| VF6         | Contig109   | 5385              | AAB22972.1     | 98.58%   | Dengue virus 1                           |
| VF9         | Contig30    | 4057              | UHS18432.1     | 57.14%   | Gammatorque virus sp.                    |
| VF1         | Contig340   | 2124              | WET51920.1     | 76.19%   | Wenzhou sobemo-like virus 4              |
| VF9         | Contig92    | 30                | WET51920.1     | 97.22%   | Wenzhou sobemo-like virus 4              |
| VF3         | Contig328   | 752               | YP_667900.1    | 38.59%   | Neodiprion abietis NPV                   |
| VF7         | Contig1855  | 59                | QOI91445.1     | 65.52%   | Kvale mosquito virus                     |
| VF2         | Contig402   | 44                | QQN95304.1     | 91.89%   | Hubei mosquito virus 2                   |
| VF7         | Contig366   | 30                | AAB66528.1     | 71.43%   | Multiple sclerosis associated retrovirus |
| VF9         | Contig7     | 66552             | YP_009015548.1 | 31.71%   | Bacillus virus G                         |
| VF8         | Contig97    | 53362             | YP_004306459.1 | 67.14%   | Burkholderia phage KL3                   |
| VF8         | Contig7     | 3260              | YP_008766887.1 | 36.72%   | Shigella phage SfIV                      |
| VF2         | Contig13    | 2847              | YP_009008153.1 | 49.21%   | Synechococcus phage ACG-2014h            |
| VF9         | Contig22    | 988               | YP_009147760.1 | 46.94%   | Lactococcus phage WRP3                   |
| VF7         | Contig3878  | 428               | YP_762585.1    | 40.95%   | Lactococcus phage Q54                    |
| VF7         | Contig1103  | 221               | YP_009616323.1 | 30.09%   | Rhodobacter virus RcCronus               |
| VF7         | Contig7326  | 89                | YP_004957306.1 | 34.62%   | Planktothrix phage PaV-LD                |
| VF7         | Contig9719  | 30                | YP_008531773.1 | 76.47%   | Propionibacterium virus PHL037M02        |
| VF7         | Contig9718  | 15                | YP_009159919.1 | 100.00%  | Propionibacterium virus Stormborn        |
| VF2         | Contig914   | 15                | YP_009497840.1 | 66.67%   | Escherichia virus G4                     |

Table S5. GMV patient information and hematology lab results.

| Information                   | Normal value                                            | GMV Patient code                  |                     |                                                   |                                                   |
|-------------------------------|---------------------------------------------------------|-----------------------------------|---------------------|---------------------------------------------------|---------------------------------------------------|
|                               |                                                         | S90                               | S247                | D256*                                             | D341*                                             |
| Age                           |                                                         | 10 years                          | 40 years            | 3.7 years                                         | 8.3 years                                         |
| Gender                        |                                                         | Male                              | Female              | Female                                            | Female                                            |
| Body Temperature              | <37.5                                                   | 38.6                              | 38.4                | 38.5                                              | 39.7                                              |
| Fever period before admission |                                                         | 1 day                             | 1 day               | 4 days                                            | 4 days                                            |
| Occupation                    |                                                         | Under the guardianship of parents | Contract            | Under the guardianship of parents                 | Under the guardianship of parents                 |
| <b>Hematology lab</b>         |                                                         |                                   |                     |                                                   |                                                   |
| WBC                           | 4,500-10,000 Cells/ $\mu$ L                             | 116,700                           | 126,300             | 4,600<br>(14,200-5,000)                           | 5,650<br>(13,600-111,700)                         |
| Red blood cell                | 4.2x10 <sup>6</sup> -6.3x10 <sup>6</sup> Cells/ $\mu$ L | 5.1x10 <sup>6</sup>               | 5.1x10 <sup>6</sup> | 5.4x10 <sup>6</sup><br>(5.1-5.6x10 <sup>6</sup> ) | 5.8x10 <sup>6</sup><br>(4.8-6.5x10 <sup>6</sup> ) |
| Hemoglobin                    | M:13-17.4, F:12-16 g/dL                                 | 13.4                              | 18.7                | 12.9<br>(12.1-13.2)                               | 14<br>(11.6-15.4)                                 |
| Hematocrit                    | M:40-54, F:37-47 %                                      | 137.9                             | 128                 | 38.5<br>(136.8-40.1)                              | 41.7<br>(136.3-46.3)                              |
| MCV                           | 80-100 fL                                               | 174                               | 155                 | 172<br>(171-172)                                  | 172.5<br>(172-175)                                |
| MCH                           | 27-32 pg                                                | 126.1                             | 117.2               | 23.8<br>(23.5-24.1)                               | 24.1<br>(23.6-24.3)                               |
| MCHC                          | 32-36 g/dL                                              | 35.2                              | 131.2               | 33.2<br>(32.8-33.5)                               | 33<br>(32-33.5)                                   |
| RDW                           | 11.5-14.5 %                                             | 12.6                              | 117.2               | 115<br>(14.4-115.7)                               | 115<br>(13.6-116.3)                               |
| Platelet count                | 140,000-400,000 Cells/ $\mu$ L                          | 352,000                           | 352,000             | 148,500<br>(121,000-234,000)                      | 198,000<br>(129,000-357,000)                      |
| Neutrophil                    | 50-70 %                                                 | 63.4                              | 189                 | 146.8<br>(138.1-148.3)                            | 58.3<br>(117-181.6)                               |
| Lymphocyte                    | 20-40 %                                                 | 25.9                              | 15.5                | 43.85<br>(42.6-152.4)                             | 36.45<br>(10.6-168)                               |
| Monocyte                      | 2-8 %                                                   | 18.8                              | 4.1                 | 18.1<br>(6.6-18.5)                                | 6.1<br>(3.3-111.2)                                |
| Eosinophil                    | 1-6 %                                                   | 1.3                               | 1.1                 | 10.7<br>(10.3-10.8)                               | 10.6<br>(10-1.2)                                  |
| Basophil                      | 0-1 %                                                   | 0.6                               | 0.3                 | 0.8<br>(0.5-11.5)                                 | 0.4<br>(0-0.5)                                    |
| Atypical lymph                | 0-2.5 %                                                 | 1                                 | 0.5                 | 1<br>(0.8-1.5)                                    | 1.1<br>(0.7-19)                                   |

**Note:** WBC = White blood cell Count, MCV = Mean corpuscular volume, MCH = Mean corpuscular hemoglobin, MCHC = Mean corpuscular hemoglobin concentration and RDW = Red blood cell distribution width. \* = Median (min-max) for hematology laboratory results.
